# Supplementary material for: Application of WRF-LES on the Simulation of Seasonal Characteristics of Atmospheric Boundary Layer Structure in Taklamakan Desert
Source: MDPI journal article supplement (doi:10.3390/rs16030558), 2024-01-31
Supplement: s1 [file s1]

(i) WS

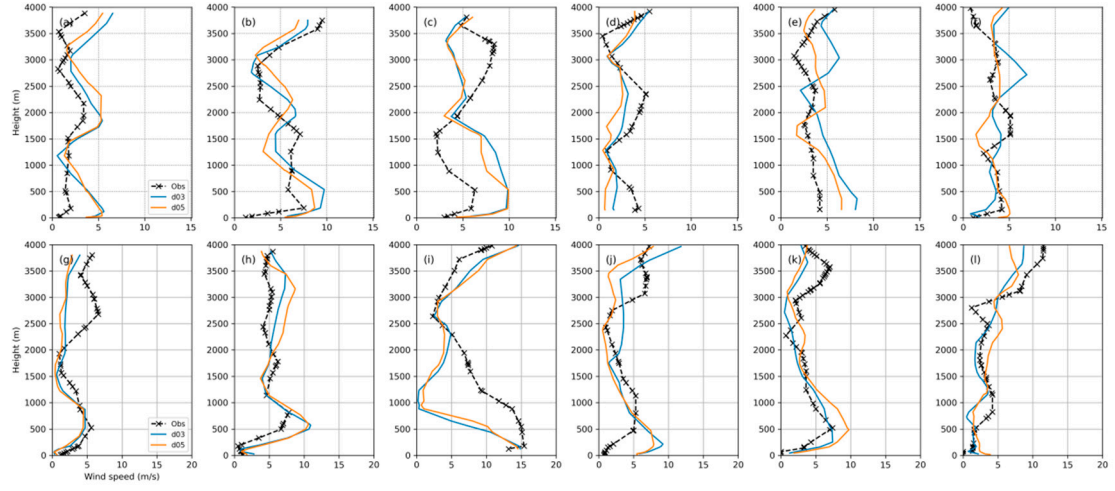

(ii) Theta

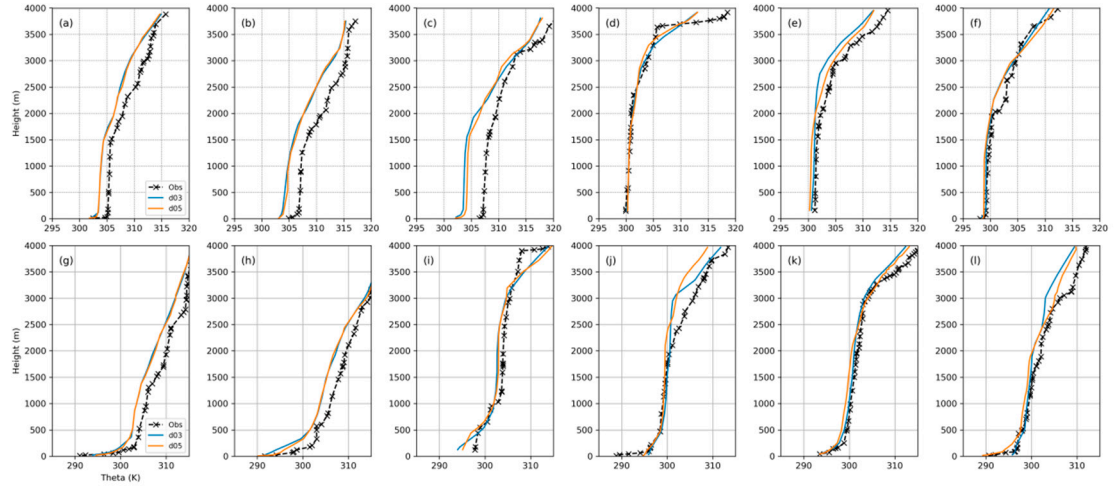

(iii) Rh

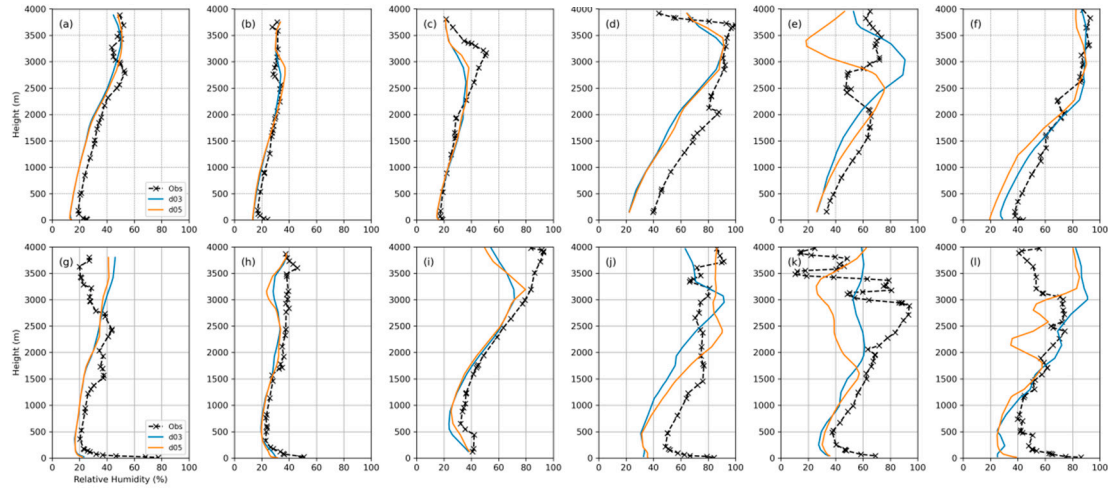

**Figure S1.** The comparison of profiles during the autumn simulation, (i) are horizontal wind speed, (ii) are potential temperature and (iii) are relative humidity. (a)-(f) Represent comparisons at 1200 UTC and (g)-(m) represent comparisons at 0000 UTC.

(i) WS

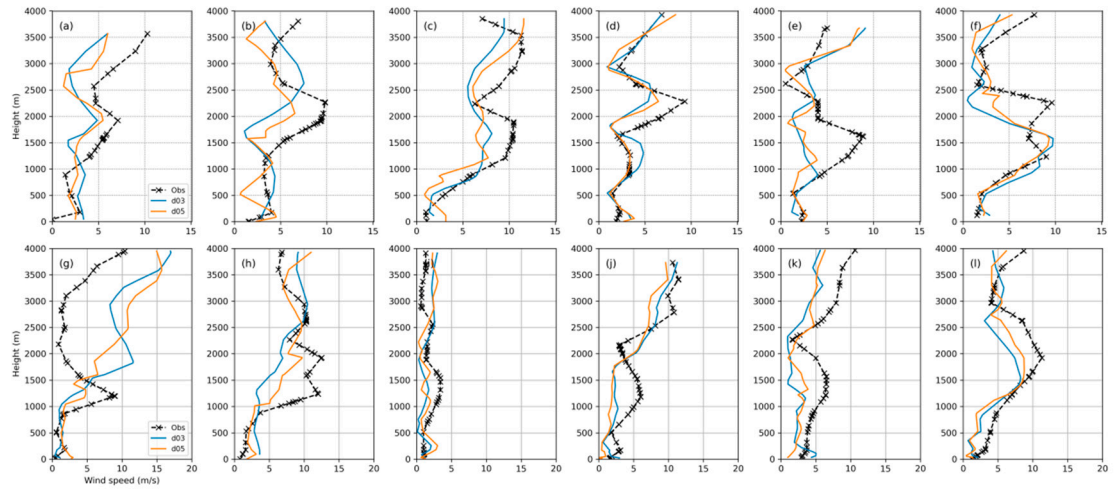

(ii) Theta

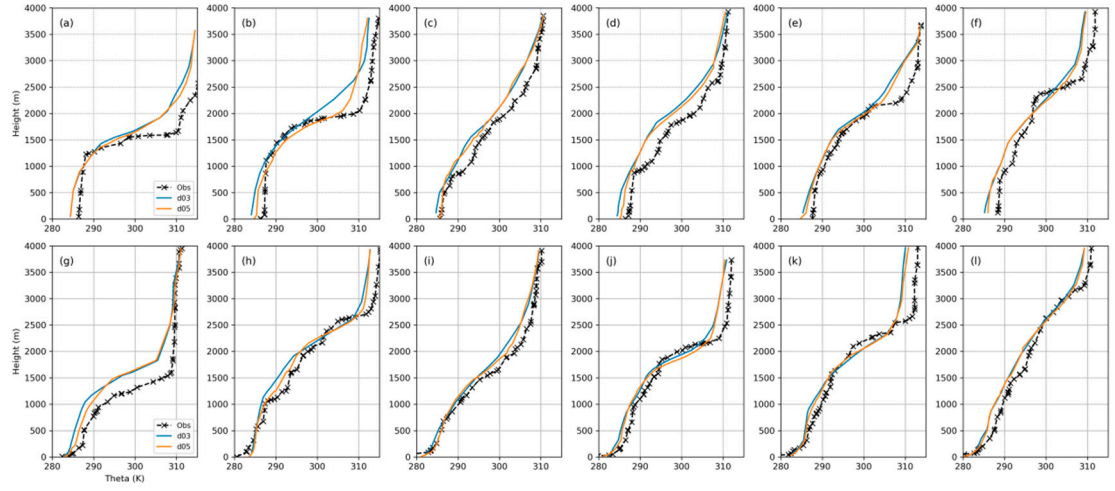

(iii) Rh

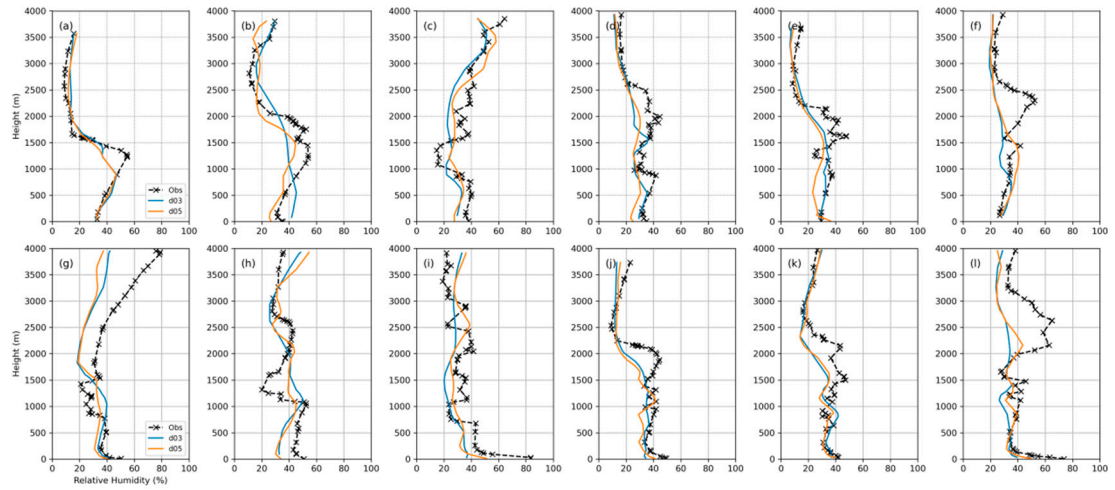

Figure S2. Same as Figure S1, but for profiles in winter.

(i) WS

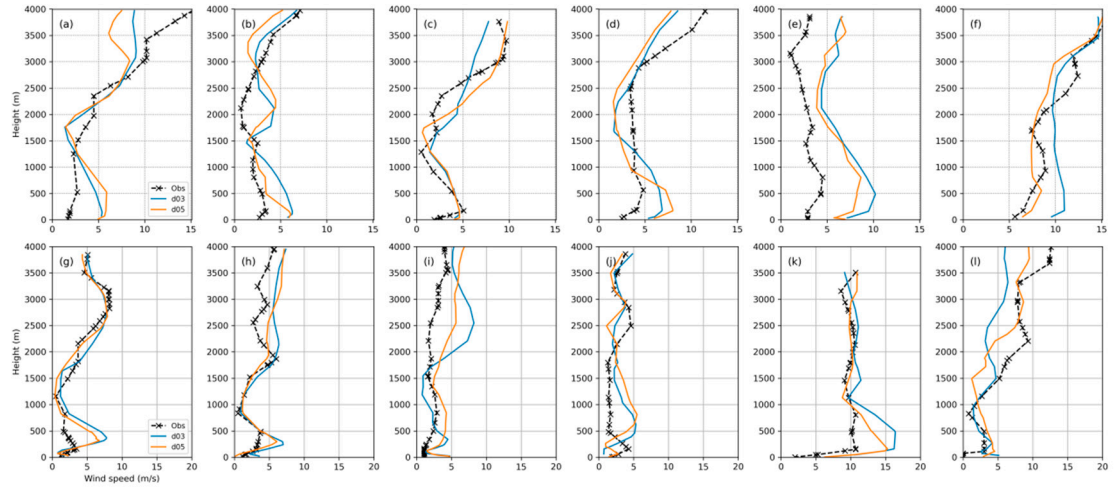

(ii) Theta

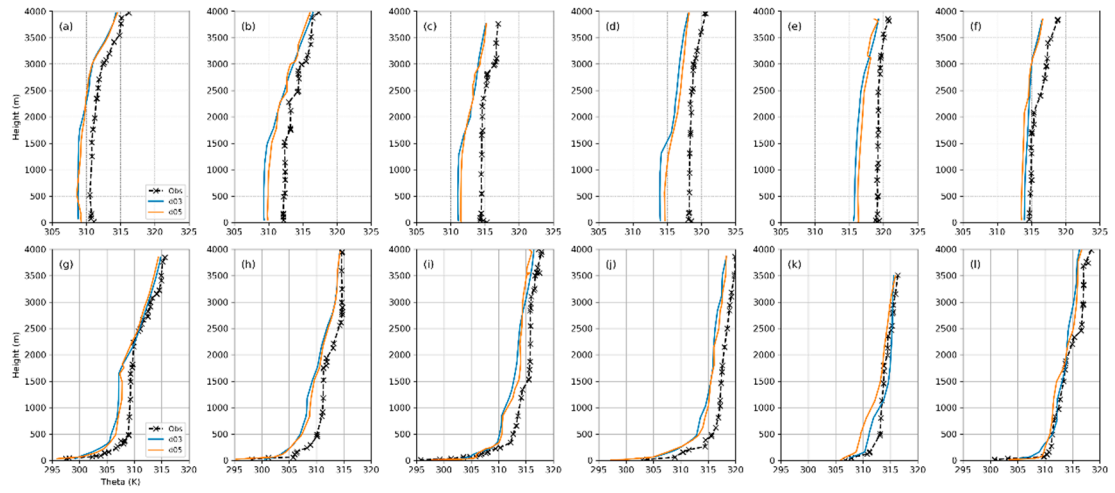

(iii) Rh

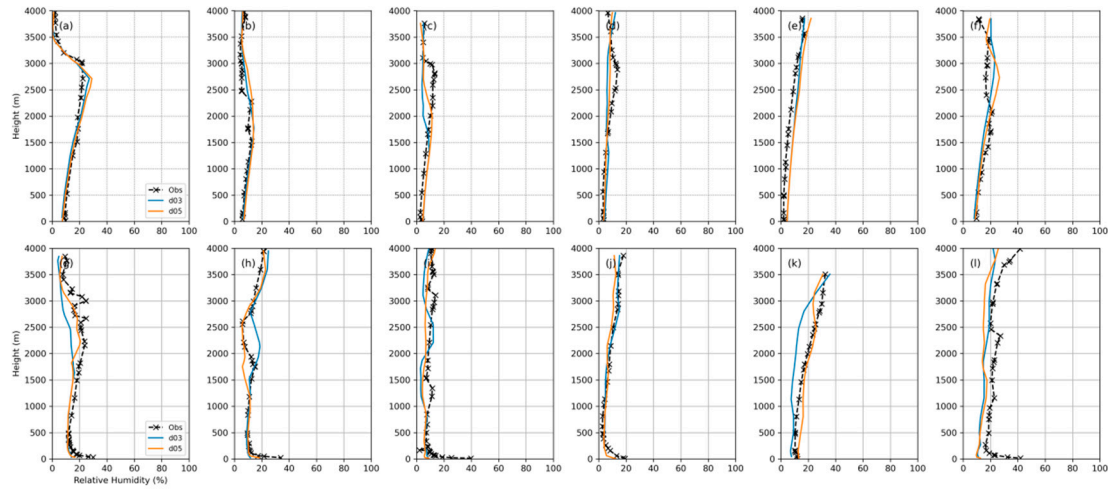

**Figure S3.** Same as Figure S1, but for profiles in spring.

(i) WS

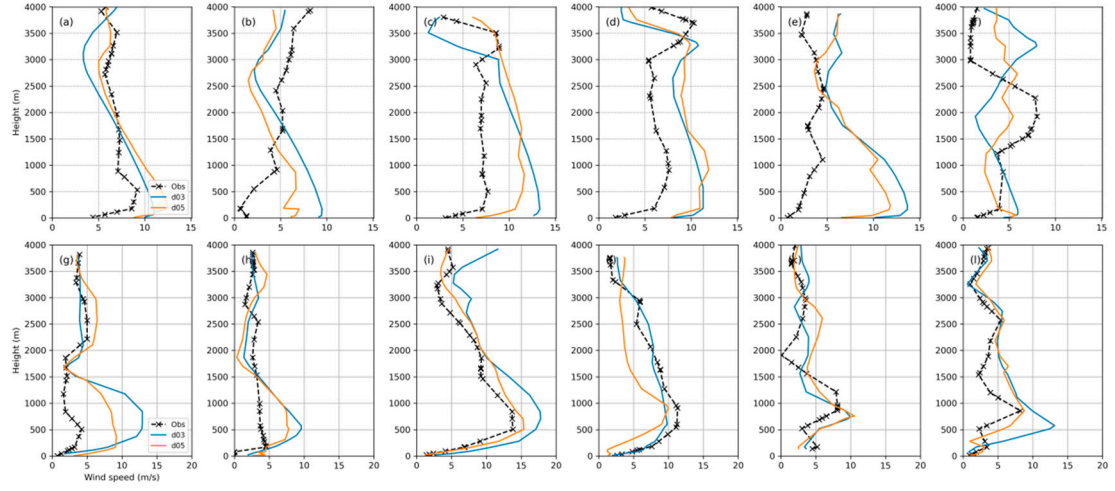

(ii) Theta

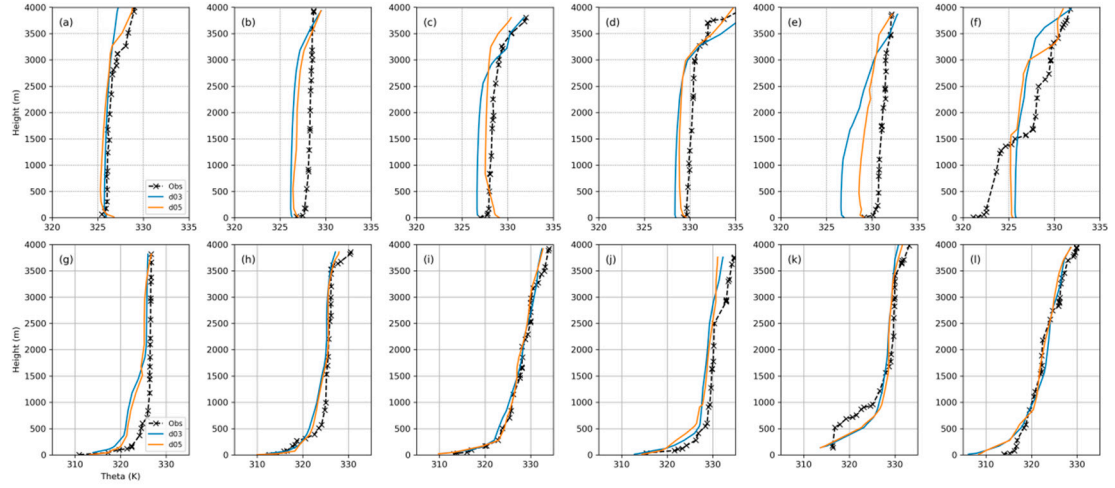

(iii) Rh

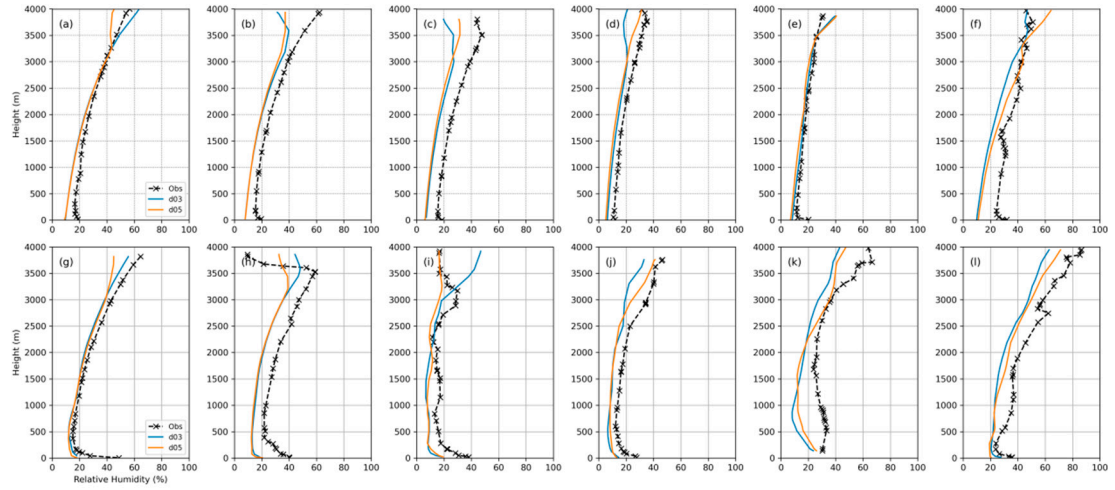

**Figure S4.** Same as Figure S1, but for profiles in summer.
